A. Net1, HeLa

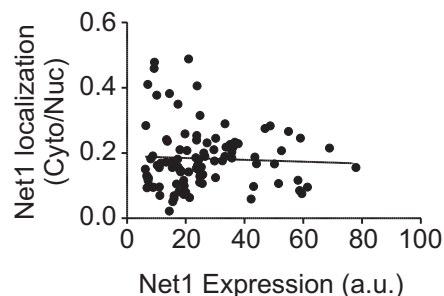

B. Net1A, HeLa

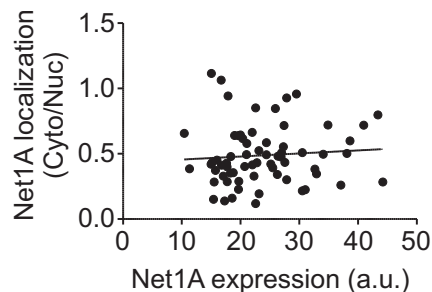

C. Net1A, MCF7

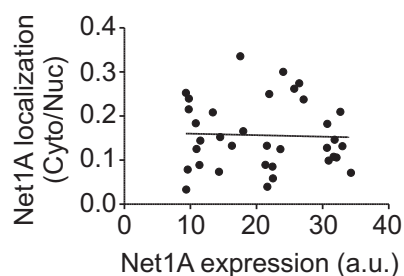

### Supplementary Figure

Figure S1. Examples of data sets used to determine the range of Net1 isoform expression where subcellular localization does not change as a function of expression level. In all cases the slope of the trend line was not statistically different from zero, indicating that expression level does not affect localization. (A) HeLa cells transfected with wild type HA-Net1. This range of expression was used to determine the importance of Net1 NLS mutants. (B) HeLa cells transfected with wild type HA-Net1A. This range of expression was used to determine the importance of Net1A NLS mutants. (C) MCF7 cells transfected with wild type Net1A. This range of expression was used to determine the importance of Rac1 expression in EGF-stimulated Net1A localization.
